# Supplementary material for: Identification and New Indication of Melanin-Concentrating Hormone Receptor 1 (MCHR1) Antagonist Derived from Machine Learning and Transcriptome-Based Drug Repositioning Approaches
Source: MDPI journal article supplement (doi:10.3390/ijms23073807), 2022-03-30
Supplement: s1 [file s1]

## Supplementary Information

### **Identification and new indication of melanin-concentrating hormone receptor 1 (MCHR1) antagonist derived from machine learning and transcriptome-based drug repurposing approaches**

Gyutae Lim <sup>1</sup>, Ka Young You <sup>1,5</sup>, Jeong Hyun Lee <sup>1,5</sup>, Moon Kook Jeon <sup>1</sup>, Byung Ho Lee <sup>1</sup>, Jae Yong Ryu <sup>3,4,\*</sup>, and Kwang-Seok Oh <sup>1,2,\*</sup>

<sup>1</sup>Data Convergence Drug Research Center, Korea Research Institute of Chemical Technology, 141 Gajeong-ro, Yuseong-gu, Daejeon 34114, Republic of Korea; gyutae@kRICT.re.kr (G.L.); uuuky@kRICT.re.kr (K.Y.Y.); jhlee@kRICT.re.kr (J.H.L.); moteta@kRICT.re.kr (M.K.J.); bhlee@kRICT.re.kr (B.H.L.); ksoh@kRICT.re.kr (K.S.O.)

<sup>2</sup>Department of Medicinal and Pharmaceutical Chemistry, University of Science and Technology, 217 Gajeong-ro, Yuseong-gu, Daejeon 34113, Republic of Korea

<sup>3</sup>Department of Biotechnology, Duksung Women's University, 33 Samyang-ro 144-gil, Dobong-gu, Seoul 01369, Republic of Korea; jyryu@duksung.ac.kr (J.Y.R.)

<sup>4</sup>Institute of BIO-ICT convergence technology, Duksung Women's University, 33 Samyang-ro 144-gil, Dobong-gu, Seoul 01369, Republic of Korea

<sup>5</sup>Graduate School of New Drug Discovery and Development, Chungnam National University, Daejeon 34134, Republic of Korea

\*Corresponding author

Jae Yong Ryu, Department of Biotechnology, Duksung Women's University, 33 Samyang-ro 144-gil, Dobong-gu, Seoul 01369, Republic of Korea

Tel: +82-2-901-8414; E-mail: jyryu@duksung.ac.kr

Kwang-Seok Oh, Data Convergence Drug Research Center, Korea Research Institute of  
Chemical Technology

141 Gajeong-ro, Yuseong-gu, Daejeon 34114, Republic of Korea.

Tel: +82-42-860-7547; Fax: +82-42-861-4246; E-mail: [ksoh@kriict.re.kr](mailto:ksoh@kriict.re.kr)

## Supplementary Figures

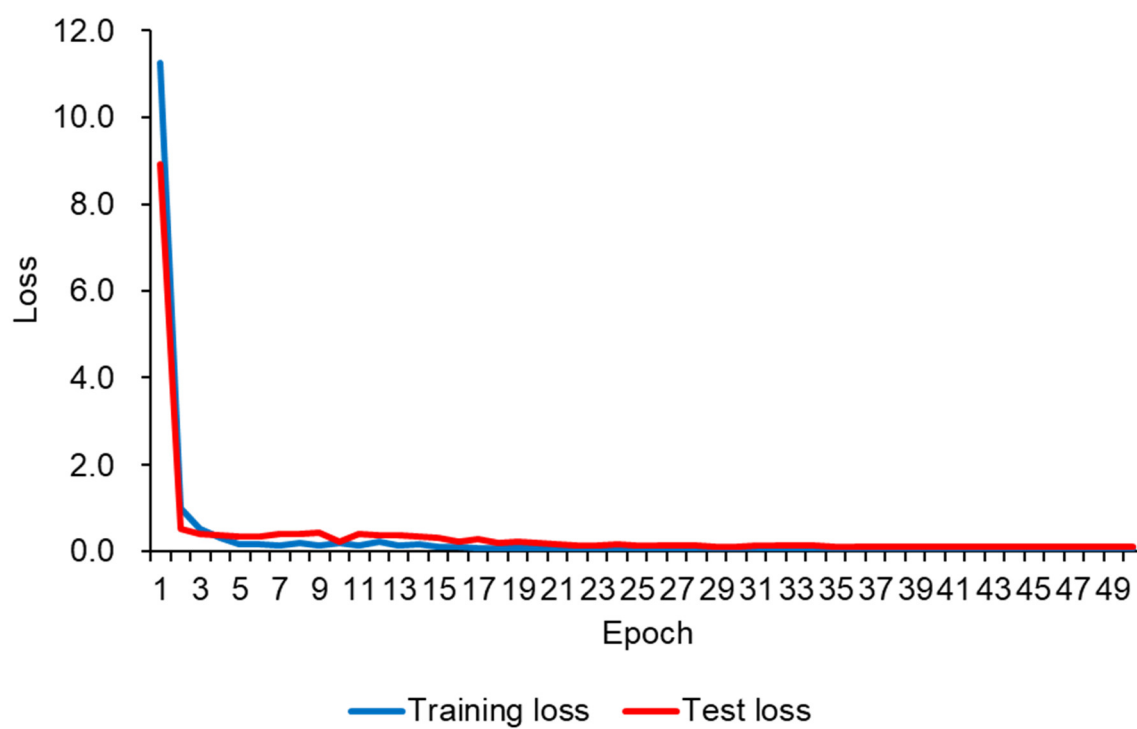

**Figure S1.** Loss curves of descriptor-based DNN (deep neural network) for 50 epochs. Loss value in each epoch was obtained from the final training procedure after optimization of the descriptor-based DNN architecture.

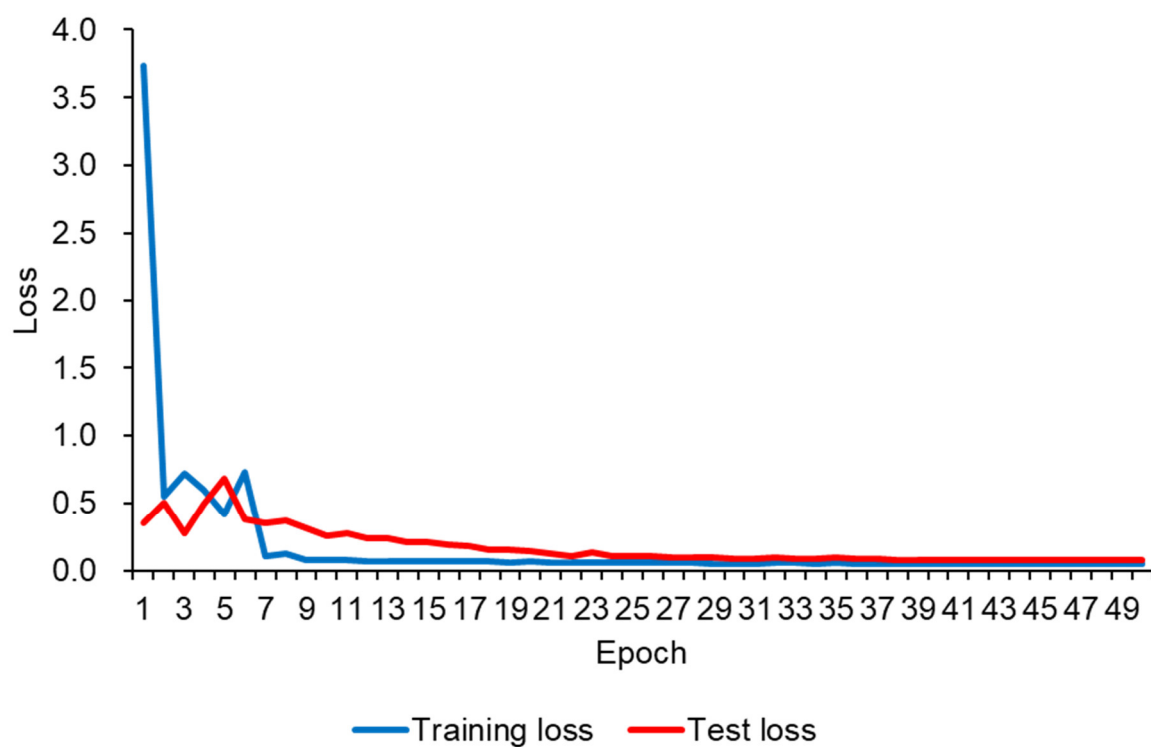

**Figure S2.** Loss curves of fingerprint-based DNN for 50 epochs. Loss value in each epoch was obtained from the final training procedure after optimization of the fingerprint-based DNN architecture.

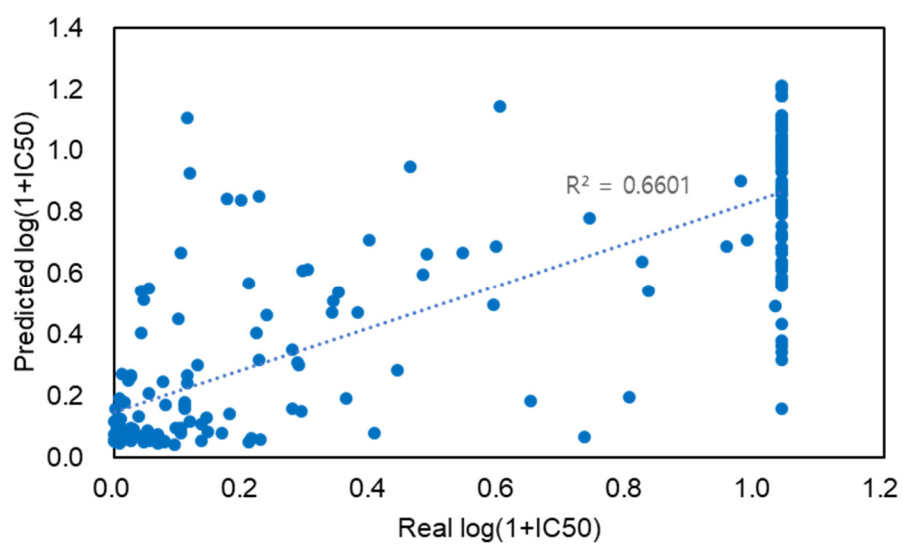

**Figure S3.** Comparison of real and predicted  $\text{IC}_{50}$  values on test dataset predicted with descriptor-based DNN.

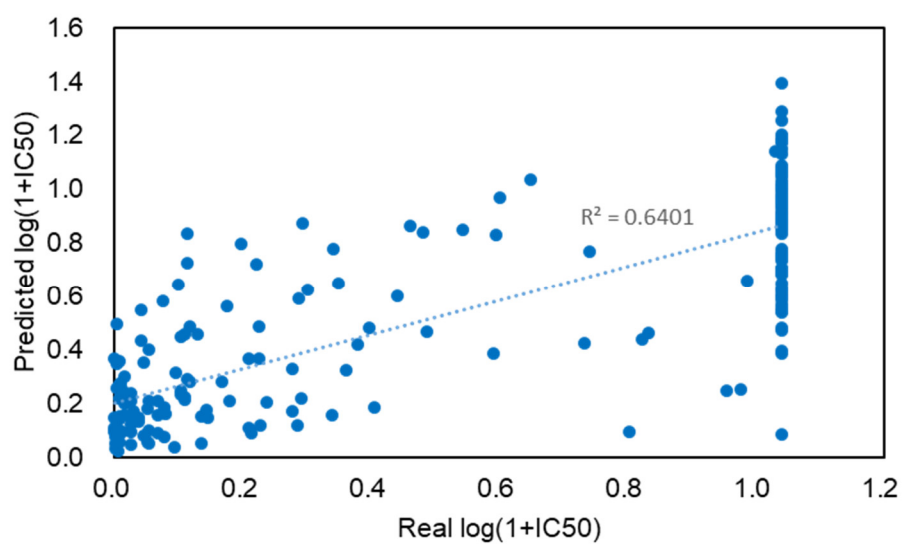

**Figure S4.** Comparison of real and predicted  $\text{IC}_{50}$  values on test dataset predicted with fingerprint-based DNN.

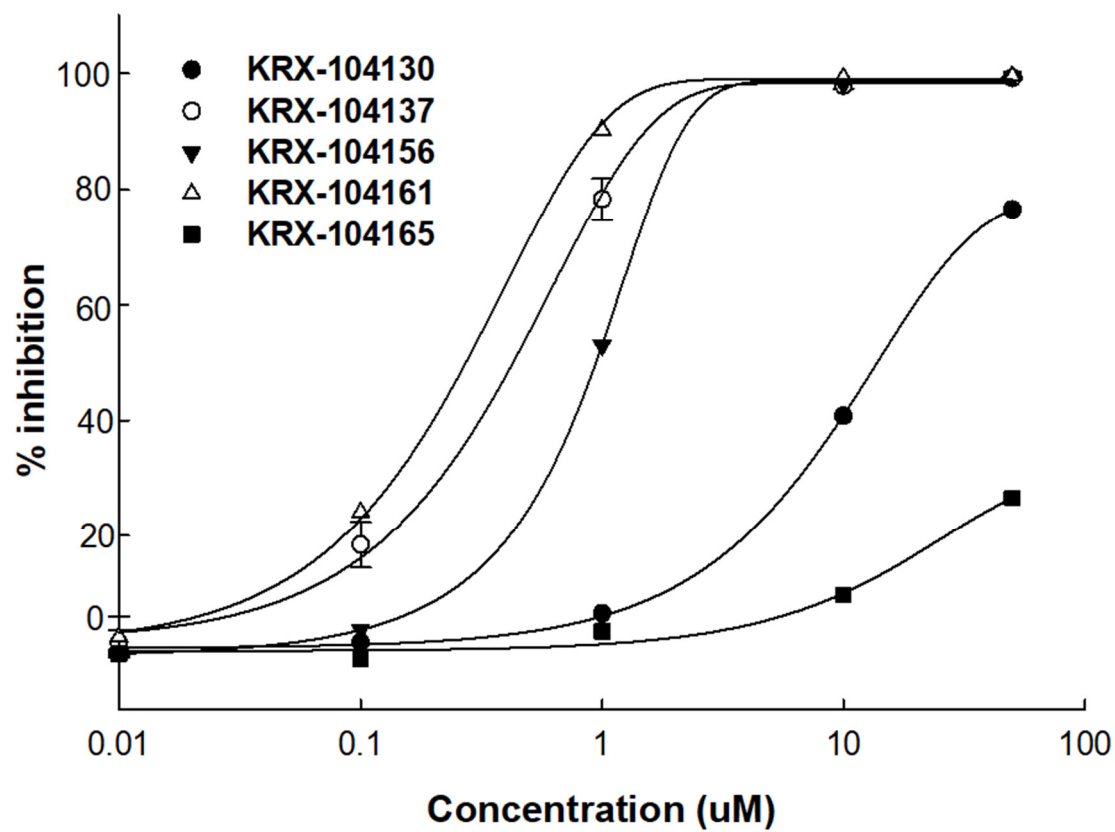

**Figure S5.** Results of hERG patch clamp activity of compounds.

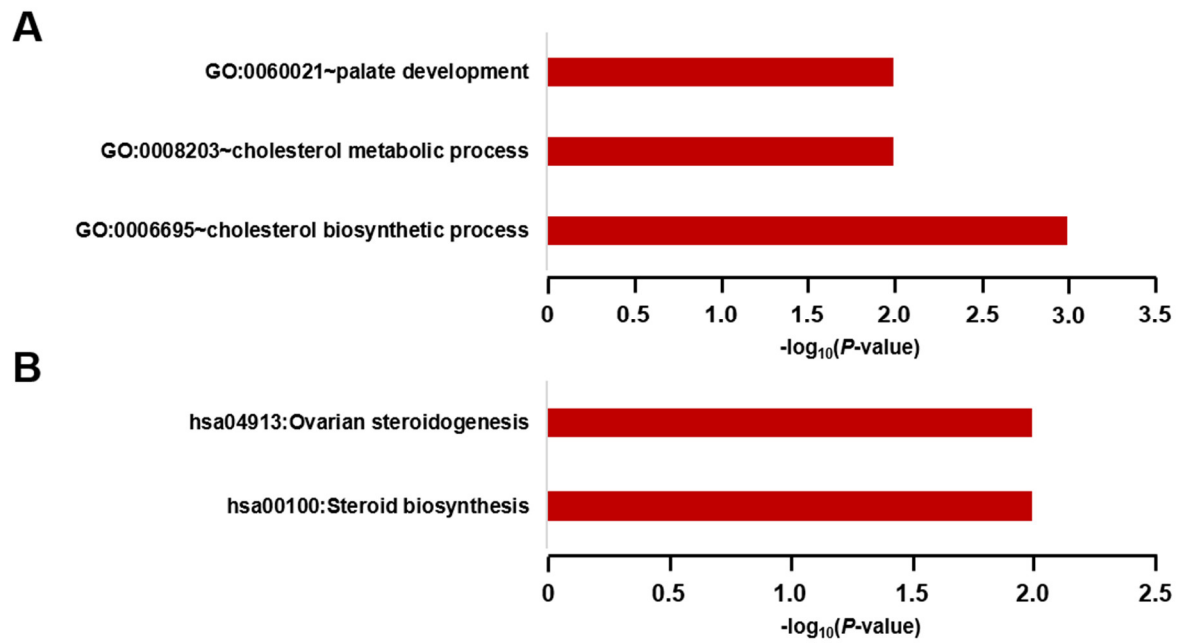

**Figure S6.** Results of (A) GO and (B) KEGG pathway enrichment analysis of nine common expression genes.



**Table S1.** Hyperparameters considered in this study

| <b>Hyperparameter</b>           | <b>Considered Values</b> |
|---------------------------------|--------------------------|
| Dropout                         | [1e-4, 1e-1]             |
| Optimizer                       | {adam, sgd}              |
| Learning rate                   | [1e-4, 1e-1]             |
| L2 regularization rate          | [1e-5, 1e-2]             |
| Batch size                      | {64, 128, 256}           |
| Number of hidden layers for DNN | [1, 6]                   |
| Number of hidden nodes for DNN  | [128, 512]               |

**Table S2.** Model performance according to the feature number.

| <b>Number of features</b> | <b>MSE (descriptor-based DNN)</b> | <b>MSE (fingerprint-based DNN)</b> |
|---------------------------|-----------------------------------|------------------------------------|
| 4                         | 0.107419911                       | 0.21144493                         |
| 6                         | 0.097933789                       | 0.215005423                        |
| 8                         | 0.095514624                       | 0.211168945                        |
| 10                        | 0.096400381                       | 0.213130072                        |
| 12                        | 0.087199683                       | 0.213911336                        |
| 14                        | 0.08989341                        | 0.215021391                        |
| 16                        | 0.101556298                       | 0.209222856                        |
| 18                        | 0.089999748                       | 0.213104152                        |
| 20                        | 0.10280343                        | 0.21506535                         |
| 22                        | 0.09572569                        | 0.209033838                        |
| 24                        | 0.09986852                        | 0.203798517                        |
| 26                        | 0.086370617                       | 0.217191686                        |
| 28                        | 0.098629042                       | 0.210982217                        |
| 30                        | 0.086209713                       | 0.209720522                        |
| 32                        | 0.090939849                       | 0.126496404                        |
| 34                        | 0.096478134                       | 0.124006814                        |
| 36                        | 0.104143513                       | 0.117156515                        |
| 38                        | 0.088350106                       | 0.118082579                        |
| 40                        | 0.087009457                       | 0.116786058                        |
| 42                        | 0.090276337                       | 0.114759636                        |
| 44                        | 0.087612216                       | 0.106564478                        |
| 46                        | 0.081124896                       | 0.115053788                        |
| 48                        | 0.085472284                       | 0.108325619                        |
| 50                        | 0.091583973                       | 0.106902817                        |
| 52                        | 0.084651182                       | 0.109758777                        |
| 54                        | 0.09395763                        | 0.105208888                        |
| 56                        | 0.094935335                       | 0.10991654                         |
| 58                        | 0.091305357                       | 0.106227923                        |
| 60                        | 0.089515732                       | 0.102030237                        |
| 62                        | 0.105699115                       | 0.102786319                        |
| 64                        | 0.108520728                       | 0.099828413                        |
| 66                        | 0.083646068                       | 0.093414478                        |
| 68                        | 0.090620394                       | 0.09736398                         |
| 70                        | 0.090169535                       | 0.100323498                        |
| 72                        | 0.104800344                       | 0.108090162                        |
| 74                        | 0.105019308                       | 0.100520873                        |
| 76                        | 0.08266998                        | 0.097670605                        |

|      |             |             |
|------|-------------|-------------|
| 78   | 0.081432832 | 0.090647249 |
| 80   | 0.078018528 | 0.099781088 |
| 82   | 0.094112599 | 0.098722838 |
| 84   | 0.094279093 | 0.090689204 |
| 86   | 0.091746977 | 0.113551788 |
| 88   | 0.097671568 | 0.086862636 |
| 90   | 0.099526806 | 0.086393084 |
| 92   | 0.07636361  | 0.089969627 |
| 94   | 0.083790312 | 0.096383782 |
| 96   | 0.081816169 | 0.089555744 |
| 98   | 0.079272888 | 0.094985159 |
| 100  | 0.104893329 | 0.09750446  |
| 150  | 0.085002216 | 0.098511639 |
| 200  | 0.091091786 | 0.082102492 |
| 250  | 0.082605022 | 0.091424834 |
| 300  | 0.07588406  | 0.088323532 |
| 350  | 0.072220735 | 0.087057681 |
| 400  | 0.075645462 | 0.08687107  |
| 450  | 0.097525982 | 0.104273715 |
| 500  | 0.071986377 | 0.086109729 |
| 600  | 0.09021143  | 0.076351046 |
| 700  | 0.084034261 | 0.081856292 |
| 800  | 0.075735933 | 0.075965901 |
| 900  | 0.081818557 | 0.090287901 |
| 1000 | 0.086410697 | 0.08259724  |
| Full | 0.07571072  | 0.082683398 |

---

**Table S3.** Hyperparameter optimization results of descriptor-based DNN and fingerprint-based DNN.

| Feature    | Mean squared error (MSE) | Learning rate | Number of layers | Number of nodes | Optimizer | Dropout rate | L2 regularization rate | Batch size |
|------------|--------------------------|---------------|------------------|-----------------|-----------|--------------|------------------------|------------|
| Descriptor | 0.072                    | 0.100         | 3                | 295             | sgd       | 0.3          | 0.00001                | 64         |
| Descriptor | 0.077                    | 0.100         | 1                | 298             | sgd       | 0.3          | 0.00001                | 64         |
| Descriptor | 0.082                    | 0.100         | 1                | 246             | sgd       | 0.3          | 0.00001                | 64         |
| Descriptor | 0.082                    | 0.100         | 6                | 128             | sgd       | 0.5          | 0.00001                | 64         |
| Descriptor | 0.085                    | 0.100         | 6                | 128             | sgd       | 0.5          | 0.00001                | 128        |
| Descriptor | 0.086                    | 0.100         | 1                | 295             | sgd       | 0.3          | 0.00001                | 64         |
| Descriptor | 0.092                    | 0.100         | 1                | 324             | sgd       | 0.3          | 0.00001                | 64         |
| Descriptor | 0.092                    | 0.062         | 5                | 362             | sgd       | 0.4          | 0.00001                | 64         |
| Descriptor | 0.093                    | 0.100         | 1                | 297             | sgd       | 0.3          | 0.00001                | 64         |
| Descriptor | 0.094                    | 0.100         | 6                | 294             | sgd       | 0.3          | 0.00001                | 64         |
| Descriptor | 0.096                    | 0.100         | 1                | 295             | sgd       | 0.3          | 1.00E-05               | 64         |
| Descriptor | 0.098                    | 0.100         | 1                | 295             | sgd       | 0.3          | 0.00001                | 64         |
| Descriptor | 0.101                    | 0.100         | 6                | 128             | sgd       | 0.4          | 0.00001                | 64         |
| Descriptor | 0.101                    | 0.100         | 1                | 512             | sgd       | 0.5          | 0.00001                | 64         |
| Descriptor | 0.102                    | 0.100         | 1                | 294             | sgd       | 0.3          | 1.37805E-05            | 64         |
| Descriptor | 0.106                    | 0.100         | 1                | 396             | sgd       | 0.3          | 2.11965E-05            | 128        |
| Descriptor | 0.108                    | 0.001         | 3                | 159             | sgd       | 0.4          | 0.00001                | 128        |
| Descriptor | 0.114                    | 0.100         | 2                | 424             | sgd       | 0.3          | 0.00001                | 128        |
| Descriptor | 0.120                    | 0.100         | 6                | 437             | sgd       | 0.5          | 0.00001                | 128        |
| Descriptor | 0.120                    | 0.100         | 1                | 380             | sgd       | 0.3          | 1.49E-05               | 256        |
| Descriptor | 0.120                    | 0.019         | 6                | 271             | sgd       | 0.4          | 0.00001                | 128        |
| Descriptor | 0.130                    | 0.100         | 6                | 373             | sgd       | 0.5          | 1.53584E-05            | 128        |
| Descriptor | 0.142                    | 0.100         | 1                | 254             | sgd       | 0.4          | 6.68547E-05            | 256        |

|            |       |       |   |     |      |     |             |     |
|------------|-------|-------|---|-----|------|-----|-------------|-----|
| Descriptor | 0.160 | 0.001 | 6 | 306 | sgd  | 0.3 | 1.27745E-05 | 128 |
| Descriptor | 0.172 | 0.001 | 5 | 362 | sgd  | 0.3 | 2.66421E-05 | 64  |
| Descriptor | 0.174 | 0.000 | 2 | 148 | adam | 0.4 | 7.77294E-05 | 256 |
| Descriptor | 0.174 | 0.000 | 1 | 128 | adam | 0.5 | 0.000221335 | 128 |
| Descriptor | 0.183 | 0.001 | 1 | 312 | adam | 0.5 | 0.01        | 128 |
| Descriptor | 0.193 | 0.001 | 1 | 128 | adam | 0.5 | 0.000220413 | 256 |
| Descriptor | 0.201 | 0.100 | 6 | 128 | adam | 0.4 | 0.01        | 64  |
| Descriptor | 0.214 | 0.001 | 1 | 506 | adam | 0.5 | 0.000798096 | 64  |
| Descriptor | 0.215 | 0.066 | 6 | 128 | sgd  | 0.3 | 0.000121226 | 128 |
| Descriptor | 0.245 | 0.001 | 6 | 128 | adam | 0.5 | 0.01        | 64  |
| Descriptor | 0.254 | 0.000 | 1 | 128 | adam | 0.5 | 7.7638E-05  | 256 |
| Descriptor | 0.254 | 0.100 | 1 | 128 | adam | 0.5 | 0.00001     | 128 |
| Descriptor | 0.266 | 0.000 | 3 | 128 | adam | 0.3 | 1.00E-05    | 64  |
| Descriptor | 0.271 | 0.099 | 3 | 452 | adam | 0.5 | 0.0032384   | 128 |
| Descriptor | 0.281 | 0.069 | 2 | 494 | adam | 0.4 | 0.01        | 256 |
| Descriptor | 0.285 | 0.003 | 1 | 128 | sgd  | 0.3 | 0.00001     | 256 |
| Descriptor | 0.297 | 0.002 | 1 | 207 | adam | 0.4 | 7.07E-04    | 256 |
| Descriptor | 0.298 | 0.100 | 6 | 128 | adam | 0.4 | 0.000937362 | 256 |
| Descriptor | 0.300 | 0.100 | 1 | 128 | adam | 0.5 | 3.80E-03    | 128 |
| Descriptor | 0.300 | 0.000 | 6 | 512 | sgd  | 0.4 | 1.00E-05    | 256 |
| Descriptor | 0.309 | 0.100 | 1 | 128 | adam | 0.5 | 4.72E-04    | 64  |
| Descriptor | 0.312 | 0.100 | 6 | 386 | sgd  | 0.4 | 1.50E-05    | 128 |
| Descriptor | 0.322 | 0.070 | 1 | 139 | sgd  | 0.5 | 6.38E-05    | 256 |
| Descriptor | 0.327 | 0.000 | 6 | 128 | sgd  | 0.5 | 0.00001     | 128 |
| Descriptor | 0.327 | 0.100 | 2 | 128 | sgd  | 0.5 | 1.00E-05    | 128 |
| Descriptor | 0.329 | 0.070 | 1 | 186 | sgd  | 0.4 | 1.00E-05    | 256 |

|            |       |       |   |     |      |     |             |     |
|------------|-------|-------|---|-----|------|-----|-------------|-----|
| Descriptor | 0.340 | 0.000 | 1 | 128 | adam | 0.4 | 0.000181384 | 64  |
| Descriptor | 0.349 | 0.001 | 1 | 128 | adam | 0.4 | 0.01        | 256 |
| Descriptor | 0.363 | 0.010 | 4 | 128 | sgd  | 0.4 | 0.00001     | 128 |
| Descriptor | 0.395 | 0.000 | 6 | 512 | adam | 0.3 | 0.01        | 64  |
| Descriptor | 0.408 | 0.100 | 1 | 128 | sgd  | 0.3 | 0.01        | 256 |
| Descriptor | 0.412 | 0.026 | 4 | 161 | adam | 0.4 | 8.85E-05    | 256 |
| Descriptor | 0.454 | 0.091 | 2 | 130 | adam | 0.3 | 8.17E-04    | 64  |
| Descriptor | 0.458 | 0.001 | 6 | 128 | adam | 0.4 | 0.01        | 64  |
| Descriptor | 0.476 | 0.000 | 6 | 193 | sgd  | 0.3 | 0.00001     | 64  |
| Descriptor | 0.489 | 0.100 | 6 | 128 | adam | 0.3 | 0.00001     | 64  |
| Descriptor | 0.492 | 0.100 | 6 | 128 | sgd  | 0.3 | 0.00015298  | 128 |
| Descriptor | 0.506 | 0.000 | 6 | 512 | sgd  | 0.4 | 2.65442E-05 | 256 |
| Descriptor | 0.519 | 0.008 | 5 | 512 | adam | 0.4 | 8.46075E-05 | 128 |
| Descriptor | 0.520 | 0.100 | 6 | 128 | sgd  | 0.3 | 0.01        | 128 |
| Descriptor | 0.559 | 0.001 | 3 | 338 | adam | 0.3 | 0.006816979 | 256 |
| Descriptor | 0.570 | 0.100 | 6 | 512 | adam | 0.5 | 0.01        | 128 |
| Descriptor | 0.577 | 0.100 | 6 | 512 | sgd  | 0.5 | 1.00E-05    | 128 |
| Descriptor | 0.584 | 0.000 | 1 | 486 | sgd  | 0.3 | 1.37185E-05 | 128 |
| Descriptor | 0.594 | 0.000 | 1 | 128 | adam | 0.4 | 0.000560648 | 256 |
| Descriptor | 0.602 | 0.001 | 4 | 403 | adam | 0.4 | 1.21E-03    | 64  |
| Descriptor | 0.621 | 0.000 | 6 | 128 | adam | 0.5 | 3.95E-03    | 64  |
| Descriptor | 0.631 | 0.016 | 1 | 128 | adam | 0.5 | 0.01        | 64  |
| Descriptor | 0.680 | 0.000 | 1 | 215 | adam | 0.3 | 5.12834E-05 | 256 |
| Descriptor | 0.744 | 0.100 | 3 | 128 | sgd  | 0.3 | 1.00E-02    | 256 |
| Descriptor | 0.806 | 0.100 | 6 | 128 | sgd  | 0.3 | 0.01        | 256 |
| Descriptor | 0.811 | 0.100 | 6 | 128 | sgd  | 0.3 | 1.00E-02    | 256 |

|             |         |       |   |     |      |     |             |     |
|-------------|---------|-------|---|-----|------|-----|-------------|-----|
| Descriptor  | 0.897   | 0.000 | 1 | 128 | adam | 0.5 | 1.68E-03    | 256 |
| Descriptor  | 0.939   | 0.100 | 6 | 128 | sgd  | 0.4 | 0.000595982 | 128 |
| Descriptor  | 1.014   | 0.000 | 1 | 512 | adam | 0.5 | 5.33698E-05 | 256 |
| Descriptor  | 1.030   | 0.000 | 1 | 489 | adam | 0.3 | 1.00E-05    | 256 |
| Descriptor  | 1.091   | 0.100 | 1 | 128 | sgd  | 0.3 | 0.01        | 256 |
| Descriptor  | 1.092   | 0.100 | 6 | 128 | sgd  | 0.3 | 0.01        | 256 |
| Descriptor  | 1.212   | 0.100 | 1 | 128 | sgd  | 0.3 | 0.01        | 256 |
| Descriptor  | 1.867   | 0.100 | 6 | 512 | sgd  | 0.3 | 0.00015634  | 256 |
| Descriptor  | 1.964   | 0.014 | 6 | 428 | adam | 0.4 | 0.006281789 | 256 |
| Descriptor  | 1.979   | 0.067 | 3 | 433 | sgd  | 0.4 | 0.008170944 | 128 |
| Descriptor  | 2.202   | 0.000 | 1 | 396 | adam | 0.4 | 0.00001     | 64  |
| Descriptor  | 2.301   | 0.011 | 3 | 465 | sgd  | 0.3 | 1.21E-03    | 64  |
| Descriptor  | 2.467   | 0.100 | 4 | 423 | adam | 0.3 | 0.000598048 | 256 |
| Descriptor  | 2.597   | 0.012 | 2 | 462 | sgd  | 0.5 | 0.002259779 | 64  |
| Descriptor  | 2.861   | 0.010 | 3 | 512 | sgd  | 0.5 | 0.01        | 128 |
| Descriptor  | 2.952   | 0.000 | 1 | 128 | adam | 0.4 | 0.008893893 | 128 |
| Descriptor  | 3.241   | 0.000 | 1 | 128 | adam | 0.4 | 1.00E-02    | 256 |
| Descriptor  | 3.640   | 0.000 | 2 | 450 | adam | 0.3 | 0.002119927 | 64  |
| Descriptor  | 3.659   | 0.000 | 1 | 128 | sgd  | 0.3 | 0.01        | 256 |
| Descriptor  | 3.691   | 0.000 | 1 | 128 | sgd  | 0.3 | 0.01        | 128 |
| Descriptor  | 5.067   | 0.000 | 6 | 391 | sgd  | 0.5 | 1.68E-03    | 256 |
| Descriptor  | 10.136  | 0.000 | 6 | 128 | adam | 0.4 | 0.01        | 64  |
| Descriptor  | 11.178  | 0.000 | 1 | 512 | adam | 0.4 | 0.01        | 64  |
| Descriptor  | 15.017  | 0.012 | 4 | 128 | adam | 0.4 | 1.00E-05    | 256 |
| Descriptor  | 120.036 | 0.100 | 6 | 512 | adam | 0.3 | 0.000281907 | 128 |
| Fingerprint | 0.076   | 0.100 | 1 | 128 | sgd  | 0.3 | 1.00E-05    | 64  |

|             |       |       |   |     |      |     |             |     |
|-------------|-------|-------|---|-----|------|-----|-------------|-----|
| Fingerprint | 0.082 | 0.100 | 1 | 128 | sgd  | 0.3 | 0.00001     | 64  |
| Fingerprint | 0.083 | 0.100 | 1 | 128 | sgd  | 0.3 | 0.00001     | 64  |
| Fingerprint | 0.084 | 0.100 | 1 | 128 | sgd  | 0.3 | 0.00001     | 64  |
| Fingerprint | 0.087 | 0.007 | 6 | 128 | adam | 0.5 | 0.00001     | 64  |
| Fingerprint | 0.088 | 0.100 | 1 | 128 | sgd  | 0.3 | 0.00001     | 64  |
| Fingerprint | 0.091 | 0.100 | 1 | 128 | sgd  | 0.3 | 1.00E-05    | 64  |
| Fingerprint | 0.091 | 0.100 | 1 | 171 | sgd  | 0.3 | 0.00001     | 64  |
| Fingerprint | 0.093 | 0.100 | 6 | 128 | sgd  | 0.4 | 0.00001     | 64  |
| Fingerprint | 0.094 | 0.100 | 1 | 128 | sgd  | 0.3 | 0.00001     | 64  |
| Fingerprint | 0.096 | 0.100 | 1 | 128 | sgd  | 0.3 | 1.00E-05    | 64  |
| Fingerprint | 0.104 | 0.002 | 4 | 147 | adam | 0.4 | 2.96E-05    | 256 |
| Fingerprint | 0.105 | 0.100 | 1 | 512 | sgd  | 0.3 | 0.00001     | 64  |
| Fingerprint | 0.107 | 0.002 | 1 | 332 | adam | 0.4 | 3.53963E-05 | 256 |
| Fingerprint | 0.118 | 0.004 | 1 | 257 | adam | 0.4 | 0.01        | 128 |
| Fingerprint | 0.131 | 0.002 | 1 | 217 | adam | 0.4 | 0.003028869 | 128 |
| Fingerprint | 0.131 | 0.000 | 1 | 128 | sgd  | 0.5 | 3.32977E-05 | 256 |
| Fingerprint | 0.138 | 0.034 | 6 | 512 | sgd  | 0.4 | 1.00E-05    | 64  |
| Fingerprint | 0.156 | 0.015 | 6 | 422 | sgd  | 0.4 | 2.12591E-05 | 64  |
| Fingerprint | 0.166 | 0.000 | 1 | 464 | adam | 0.5 | 1.15E-03    | 128 |
| Fingerprint | 0.168 | 0.001 | 6 | 169 | sgd  | 0.3 | 1.00E-05    | 128 |
| Fingerprint | 0.176 | 0.004 | 2 | 218 | adam | 0.4 | 1.34E-04    | 256 |
| Fingerprint | 0.177 | 0.100 | 2 | 158 | adam | 0.4 | 0.00034099  | 64  |
| Fingerprint | 0.194 | 0.000 | 6 | 169 | adam | 0.4 | 9.41E-03    | 64  |
| Fingerprint | 0.198 | 0.000 | 1 | 128 | adam | 0.5 | 1.00E-05    | 128 |
| Fingerprint | 0.207 | 0.100 | 1 | 128 | adam | 0.3 | 0.00001     | 64  |
| Fingerprint | 0.211 | 0.002 | 3 | 443 | adam | 0.4 | 8.51E-04    | 256 |



|             |       |       |   |     |      |     |             |     |
|-------------|-------|-------|---|-----|------|-----|-------------|-----|
| Fingerprint | 0.220 | 0.000 | 1 | 512 | sgd  | 0.5 | 9.10782E-05 | 256 |
| Fingerprint | 0.223 | 0.001 | 6 | 209 | adam | 0.3 | 1.67E-03    | 64  |
| Fingerprint | 0.227 | 0.002 | 4 | 221 | adam | 0.4 | 3.24E-03    | 256 |
| Fingerprint | 0.229 | 0.072 | 5 | 474 | sgd  | 0.5 | 4.60818E-05 | 64  |
| Fingerprint | 0.240 | 0.002 | 6 | 487 | adam | 0.5 | 4.00E-05    | 128 |
| Fingerprint | 0.242 | 0.003 | 5 | 315 | adam | 0.5 | 9.17E-05    | 64  |
| Fingerprint | 0.250 | 0.000 | 6 | 128 | sgd  | 0.5 | 0.00001     | 256 |
| Fingerprint | 0.257 | 0.000 | 4 | 128 | sgd  | 0.5 | 0.00001     | 256 |
| Fingerprint | 0.265 | 0.100 | 1 | 128 | sgd  | 0.3 | 0.01        | 128 |
| Fingerprint | 0.266 | 0.000 | 6 | 128 | sgd  | 0.4 | 1.00E-05    | 256 |
| Fingerprint | 0.272 | 0.006 | 1 | 128 | sgd  | 0.3 | 4.16718E-05 | 64  |
| Fingerprint | 0.276 | 0.048 | 1 | 339 | adam | 0.4 | 1.00E-02    | 128 |
| Fingerprint | 0.289 | 0.000 | 6 | 128 | sgd  | 0.3 | 1.00E-05    | 128 |
| Fingerprint | 0.303 | 0.100 | 6 | 512 | adam | 0.3 | 0.00513554  | 64  |
| Fingerprint | 0.309 | 0.000 | 2 | 510 | adam | 0.5 | 3.73E-03    | 256 |
| Fingerprint | 0.313 | 0.000 | 6 | 128 | sgd  | 0.4 | 5.43571E-05 | 256 |
| Fingerprint | 0.320 | 0.002 | 1 | 351 | sgd  | 0.4 | 6.31E-05    | 128 |
| Fingerprint | 0.324 | 0.084 | 2 | 201 | sgd  | 0.3 | 1.00E-05    | 256 |
| Fingerprint | 0.331 | 0.000 | 1 | 128 | sgd  | 0.3 | 1.00E-05    | 256 |
| Fingerprint | 0.332 | 0.100 | 6 | 128 | sgd  | 0.3 | 1.00E-05    | 128 |
| Fingerprint | 0.332 | 0.000 | 5 | 128 | sgd  | 0.5 | 1.00E-05    | 256 |
| Fingerprint | 0.334 | 0.100 | 1 | 512 | adam | 0.4 | 0.003812486 | 64  |
| Fingerprint | 0.336 | 0.009 | 1 | 391 | sgd  | 0.3 | 0.00001     | 256 |
| Fingerprint | 0.343 | 0.100 | 6 | 128 | sgd  | 0.4 | 0.01        | 64  |
| Fingerprint | 0.351 | 0.012 | 1 | 205 | sgd  | 0.3 | 5.87658E-05 | 256 |
| Fingerprint | 0.369 | 0.100 | 4 | 128 | sgd  | 0.3 | 0.00001     | 128 |

|             |       |       |   |     |      |     |             |     |
|-------------|-------|-------|---|-----|------|-----|-------------|-----|
| Fingerprint | 0.385 | 0.100 | 6 | 128 | sgd  | 0.4 | 4.83102E-05 | 128 |
| Fingerprint | 0.386 | 0.100 | 4 | 128 | sgd  | 0.5 | 0.00001     | 256 |
| Fingerprint | 0.386 | 0.100 | 6 | 128 | sgd  | 0.5 | 0.00001     | 256 |
| Fingerprint | 0.396 | 0.058 | 5 | 140 | adam | 0.5 | 1.89668E-05 | 256 |
| Fingerprint | 0.402 | 0.100 | 2 | 188 | adam | 0.5 | 0.00001     | 64  |
| Fingerprint | 0.417 | 0.001 | 6 | 128 | sgd  | 0.3 | 0.000260928 | 128 |
| Fingerprint | 0.434 | 0.100 | 3 | 201 | adam | 0.5 | 0.00001     | 64  |
| Fingerprint | 0.450 | 0.100 | 6 | 512 | adam | 0.3 | 0.001059718 | 64  |
| Fingerprint | 0.453 | 0.000 | 6 | 512 | sgd  | 0.3 | 0.00001     | 128 |
| Fingerprint | 0.455 | 0.000 | 6 | 128 | sgd  | 0.4 | 0.000221428 | 64  |
| Fingerprint | 0.465 | 0.004 | 6 | 469 | adam | 0.5 | 0.000131465 | 128 |
| Fingerprint | 0.479 | 0.100 | 1 | 310 | sgd  | 0.3 | 0.00053043  | 64  |
| Fingerprint | 0.499 | 0.004 | 4 | 376 | adam | 0.4 | 2.87318E-05 | 256 |
| Fingerprint | 0.503 | 0.001 | 3 | 459 | adam | 0.4 | 0.00079776  | 256 |
| Fingerprint | 0.550 | 0.002 | 6 | 128 | sgd  | 0.4 | 0.000415649 | 128 |
| Fingerprint | 0.555 | 0.000 | 1 | 128 | sgd  | 0.5 | 0.00001     | 128 |
| Fingerprint | 0.570 | 0.100 | 3 | 128 | adam | 0.4 | 0.000149946 | 128 |
| Fingerprint | 0.611 | 0.000 | 4 | 415 | adam | 0.3 | 1.58773E-05 | 128 |
| Fingerprint | 0.614 | 0.100 | 6 | 128 | sgd  | 0.5 | 0.01        | 256 |
| Fingerprint | 0.622 | 0.100 | 1 | 512 | sgd  | 0.5 | 0.01        | 128 |
| Fingerprint | 0.633 | 0.000 | 1 | 128 | adam | 0.4 | 0.00039334  | 128 |
| Fingerprint | 0.668 | 0.000 | 4 | 512 | sgd  | 0.5 | 0.00001     | 64  |
| Fingerprint | 0.775 | 0.001 | 6 | 512 | adam | 0.5 | 0.000201703 | 128 |
| Fingerprint | 0.806 | 0.000 | 1 | 128 | adam | 0.5 | 0.000378265 | 128 |
| Fingerprint | 0.884 | 0.000 | 1 | 512 | sgd  | 0.3 | 0.000311604 | 64  |
| Fingerprint | 0.982 | 0.000 | 2 | 512 | adam | 0.3 | 0.00001     | 128 |

|             |        |       |   |     |      |     |             |     |
|-------------|--------|-------|---|-----|------|-----|-------------|-----|
| Fingerprint | 1.078  | 0.005 | 2 | 128 | sgd  | 0.3 | 0.001695399 | 128 |
| Fingerprint | 1.170  | 0.000 | 3 | 450 | adam | 0.3 | 0.000152263 | 128 |
| Fingerprint | 1.183  | 0.012 | 1 | 297 | sgd  | 0.3 | 0.001216333 | 256 |
| Fingerprint | 1.225  | 0.000 | 2 | 477 | sgd  | 0.3 | 0.000579032 | 256 |
| Fingerprint | 1.293  | 0.000 | 5 | 510 | adam | 0.3 | 0.00001     | 128 |
| Fingerprint | 1.492  | 0.023 | 1 | 128 | sgd  | 0.3 | 0.003429297 | 256 |
| Fingerprint | 2.085  | 0.000 | 1 | 498 | adam | 0.4 | 0.00001     | 64  |
| Fingerprint | 2.414  | 0.081 | 1 | 128 | adam | 0.4 | 0.000439249 | 128 |
| Fingerprint | 2.746  | 0.000 | 6 | 145 | adam | 0.3 | 0.00170569  | 64  |
| Fingerprint | 2.875  | 0.000 | 4 | 512 | adam | 0.5 | 0.00001     | 64  |
| Fingerprint | 3.172  | 0.010 | 3 | 512 | sgd  | 0.5 | 0.01        | 128 |
| Fingerprint | 3.867  | 0.000 | 1 | 361 | sgd  | 0.4 | 0.004162825 | 64  |
| Fingerprint | 7.073  | 0.014 | 1 | 285 | sgd  | 0.5 | 0.01        | 256 |
| Fingerprint | 9.521  | 0.009 | 6 | 377 | sgd  | 0.4 | 0.0040638   | 256 |
| Fingerprint | 11.878 | 0.000 | 3 | 400 | sgd  | 0.4 | 0.007164412 | 256 |
| Fingerprint | 13.966 | 0.001 | 6 | 405 | sgd  | 0.5 | 0.005721148 | 64  |
| Fingerprint | 22.041 | 0.000 | 4 | 413 | sgd  | 0.3 | 0.01        | 128 |
| Fingerprint | 31.705 | 0.017 | 4 | 284 | adam | 0.3 | 0.000273236 | 256 |
| Fingerprint | 35.055 | 0.100 | 2 | 405 | adam | 0.4 | 0.000343458 | 128 |
| Fingerprint | 72.855 | 0.100 | 6 | 512 | adam | 0.4 | 3.1144E-05  | 128 |
| Fingerprint | 91.711 | 0.100 | 5 | 336 | adam | 0.4 | 0.00001     | 256 |

---

**Table S4.** Optimal hyperparameters used in this study.

| <b>Model</b>          | <b>Mean squared error (MSE)</b> | <b>Learning rate</b> | <b>Number of layers</b> | <b>Number of nodes</b> | <b>Optimizer</b> | <b>Dropout rate</b> | <b>L2 regularization rate</b> | <b>Batch size</b> |
|-----------------------|---------------------------------|----------------------|-------------------------|------------------------|------------------|---------------------|-------------------------------|-------------------|
| Descriptor-based DNN  | 0.072                           | 0.100                | 3                       | 295                    | sgd              | 0.3                 | 0.00001                       | 64                |
| Fingerprint-based DNN | 0.076                           | 0.100                | 1                       | 128                    | sgd              | 0.3                 | 1.00E-05                      | 64                |
